# Supplementary material
Source: Research Square preprint supplement (doi:10.21203/rs.3.rs-9460664/v1)
Supplement: Supplementary file 1 [file 798bbe677e38922aafa2e480.docx]

Response to reviewers

Dear Triage Editor,

Concern 1: Written informed consent for publication is a mandatory journal requirement for all case reports. Your submission must therefore be rejected in its current form. You may resubmit once you have included a suitable consent statement confirming that written informed consent was obtained from the patient or their legal guardian for publication of this case report and any accompanying images and that a copy of written consent is available for review by the Editor-in-Chief of this journal upon request.

Author response: We sincerely apologize for this oversight in our initial submission. We have now obtained written informed consent from the patient for the publication of this case report and any accompanying information. A suitable consent statement has been added to the manuscript, confirming that written consent was obtained and that a copy is available for review by the Editor-in-Chief upon request. We are prepared to submit this documentation as part of a new submission, along with a cover letter detailing this revision and referencing the previous submission ID 27b33ba2-4fc5-4683-9fa2-4b9b9a58a32a.
